# Supplementary material
Source: publisher figshare collection journal article supplement (https://acs.figshare.com/ndownloader/files/4128973)

**Supporting Information for:**

**Long-range transport of pollutants to the Falkland Islands and Antarctica:**

**Evidence from lake sediment fly-ash particle records**

Neil L. Rose<sup>1\*</sup>, Vivienne J. Jones<sup>1</sup>, Philippa E. Noon<sup>1§</sup>, Dominic A. Hodgson<sup>2</sup>, Roger J. Flower<sup>1</sup> and Peter G. Appleby<sup>3</sup>

<sup>1</sup> *Environmental Change Research Centre, Department of Geography, University College London, Gower Street, London, WC1E 6BT. UK*

<sup>2</sup> *British Antarctic Survey, High Cross, Madingley Road, Cambridge CB3 0ET, UK*

<sup>3</sup> *Department of Mathematical Sciences, University of Liverpool, PO Box 147, Liverpool, L69 3BX UK.*

*\* author for correspondence: Tel: +44 (0) 207 679 0543; Fax: +44 (0) 207 679 0565; e-mail*

*[n.rose@ucl.ac.uk](mailto:n.rose@ucl.ac.uk)*

*§ Current address: Baits Bite Lock, Fen Road, Milton, Cambridge CB24 6AF. UK.*

| <b>Item</b> | <b>Description</b>                                            | <b>Page</b> |
|-------------|---------------------------------------------------------------|-------------|
| S1          | Electron micrographs of fly-ash particles                     | S2          |
| S2          | Wind direction data for Signy Island 1956 – 1999              | S3          |
| S3          | Location and morphological characteristics of the study lakes | S4          |
| S4          | Coring details                                                | S5          |
| S5          | Chronologies of Falkland Island lake sediment cores           | S6          |
| S6          | Cross-correlation of cores for Sombre Lake and Heywood Lake   | S8          |
| S7          | Depth-age profiles for the lake sediment cores                | S10         |

**S1. Scanning electron micrographs** of (a) spheroidal carbonaceous particle and (b) inorganic ash spheres (diameter of largest particles: c. 4 $\mu$ m) (Micrographs: Neil Rose).

(a)

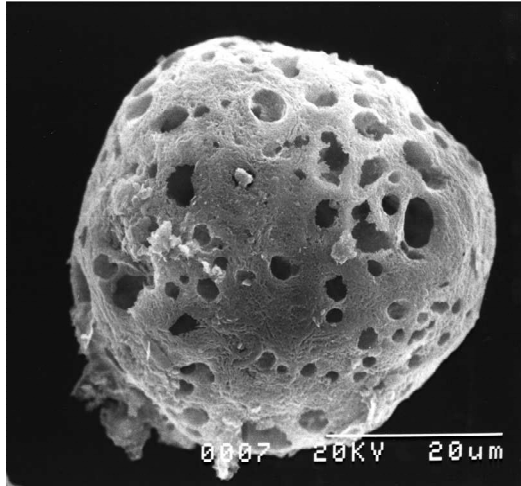

(b)

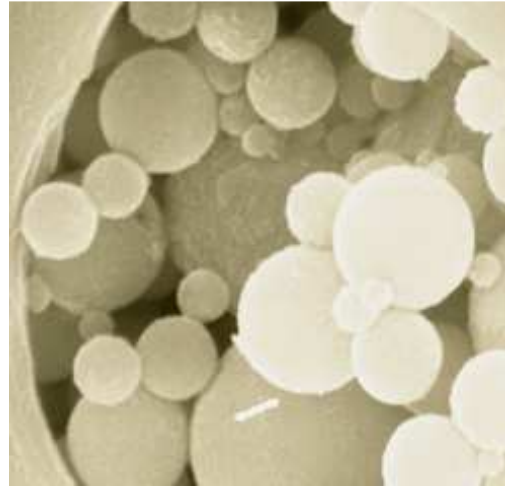

**S2. Mean daily wind direction data for Signy Island 1956 – 1999.** Covering the period from the start of meteorological observations at the British Antarctic Survey base to the date of core retrieval. Data between 1969 and 1982 are unavailable. Data from British Antarctic Survey.

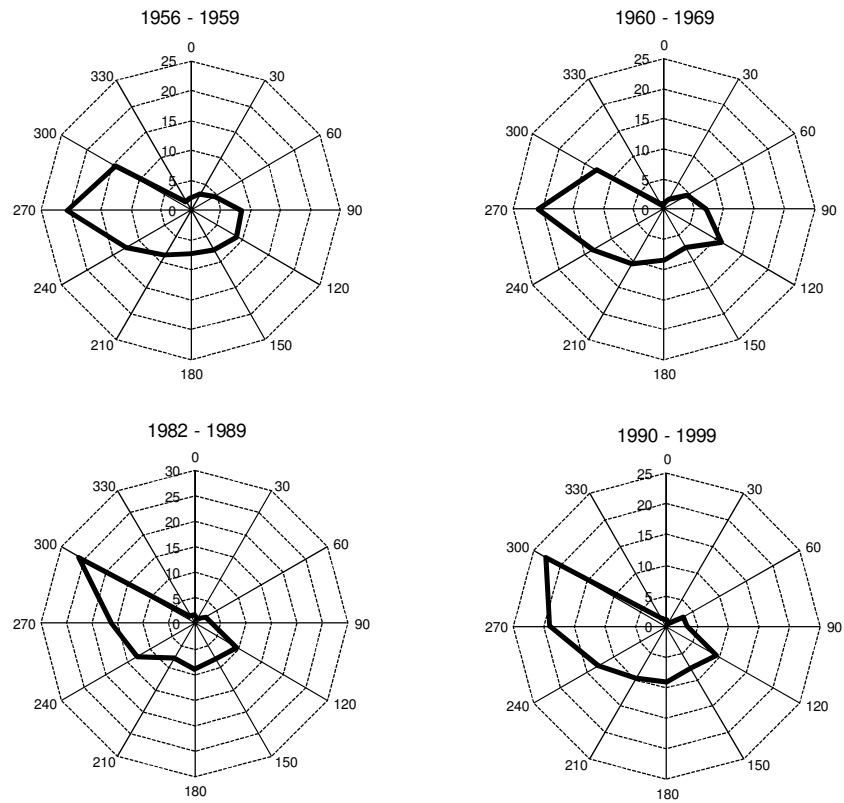

### S3. Location and morphological characteristics of the study lakes

|                         | Latitude      | Longitude     | Altitude<br>(m a.s.l.) | Lake area<br>(ha) | Maximum<br>depth (m) |
|-------------------------|---------------|---------------|------------------------|-------------------|----------------------|
| <i>Signy Island</i>     |               |               |                        |                   |                      |
| Sombre Lake             | 60° 41'13 S   | 45° 36'53'' W | 5                      | 2.1               | 10.8                 |
| Heywood Lake            | 60° 41'24'' S | 45° 36'30 W   | 5                      | 4.1               | 6.0                  |
| Tranquil Lake           | 60° 42'15'' S | 45° 38'45'' W | 30                     | 4.0               | 8.5                  |
| <i>Falkland Islands</i> |               |               |                        |                   |                      |
| Mt. Adam Tarn           | 51° 34'01'' S | 60° 03'56'' W | 620                    | 6.3               | 16                   |
| Lake Sullivan           | 51° 52'02'' S | 60° 10'10'' W | 23                     | 500               | 2.3                  |
| <i>Larsemann Hills</i>  |               |               |                        |                   |                      |
| Heart Lake              | 69° 22'33''S  | 76° 22'58'' E | 5                      | 5                 | 4.5                  |

**S4. Table of coring details**

| Core  | Date      | Depth (m) | Corer type | Extrusion                                    | Storage |
|-------|-----------|-----------|------------|----------------------------------------------|---------|
| HEY1  | 25 Nov 91 | 4.0       | Gravity    | 0.2cm to 10cm then 0.5cm to base             | 4°C     |
| HEY2  | 25 Nov 91 | 3.9       | Piston     | 0.5cm                                        | 4°C     |
| SOMB2 | 4 Dec 91  | 10.4      | Piston     | 0.5cm to 30cm then 1cm to base               | 4°C     |
| SOMB5 | 4 Dec 91  | 10.8      | Gravity    | 1cm intervals                                | 4°C     |
| TRAN1 | 29 Nov 91 | 8.5       | Gravity    | 1cm intervals                                | 4°C     |
| FILP1 | 3 Mar 01  | 14.0      | Gravity    | 0.2cm to 20cm; 0.5cm to 30cm;<br>1cm to base | 4°C     |
| FILE2 | 27 Feb 01 | 2.0       | Gravity    | 1cm                                          | 4°C     |
| LH68  | 21 Nov 97 | 4.5       | Gravity    | 1cm                                          | Frozen  |

## **S5. Chronologies of Falkland Island lake sediment cores (Peter Appleby).**

Methods of radiometric analysis are as described in the main paper.

### **Adam Tarn**

Figure S5i plots  $^{210}\text{Pb}$  dates in core FILP1 calculated using the CRS and CIC model, together with the 1964/5 depth indicated by the  $^{137}\text{Cs}$  record. The  $^{210}\text{Pb}$  dates place 1964/5 at depths 2.1 cm (CRS model) and 2.45 cm (CIC model), significantly below the  $^{137}\text{Cs}$  peak. It is unlikely that the discrepancy between the  $^{210}\text{Pb}$  and  $^{137}\text{Cs}$  dates is due to a loss of sediment from the top of the core, and so the most likely cause is a small degree of sediment mixing. The effect of this is relatively greater in cores with very low accumulation rates. In the deeper sections of the core the  $^{210}\text{Pb}$  results suggest a uniform sedimentation rate of  $0.0045 \pm 0.0006 \text{ g cm}^{-2} \text{ y}^{-1}$ . Applying this rate to the upper sections of FILP1 places 1964/5 at a depth of 1.5 cm. Figures S5i and S5ii plot corrected  $^{210}\text{Pb}$  dates using this value.

### **Lake Sullivan**

Figure S5iii plots  $^{210}\text{Pb}$  dates for FILE 2 calculated using the CRS and CIC models, together with the 1964/5 depth indicated by the  $^{137}\text{Cs}$  record. The  $^{210}\text{Pb}$  dates place 1964/5 at depths 2.1 cm (CRS model) and 2.45 cm (CIC model). The  $^{210}\text{Pb}$  dates are in relatively good agreement with each other, and with the  $^{137}\text{Cs}$  record, placing 1964/5 at a depth of between 19-20 cm. They suggest a mean sedimentation rate of  $0.027 \pm 0.006 \text{ g cm}^{-2} \text{ y}^{-1}$ . Figure S5ii plots dates calculated using this value.

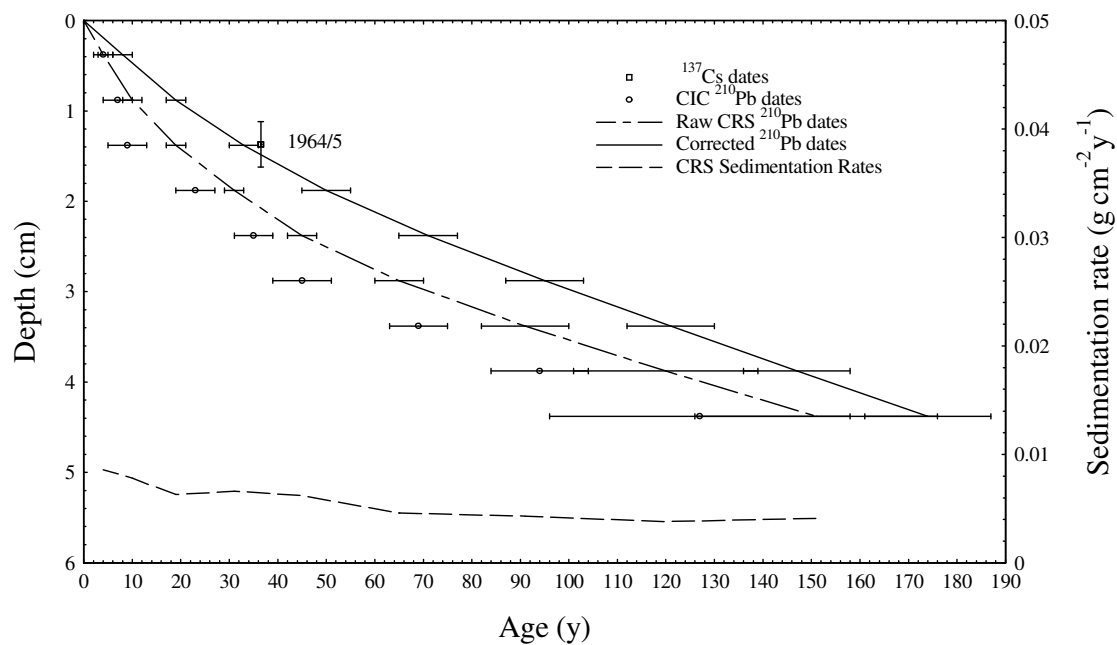

**Figure S5i.** Radiometric chronology of Adam Tarn core FILP1, showing CRS and CIC model  $^{210}\text{Pb}$  dates, the 1963 depth determined from the  $^{137}\text{Cs}$  stratigraphy, and the corrected  $^{210}\text{Pb}$  dates.

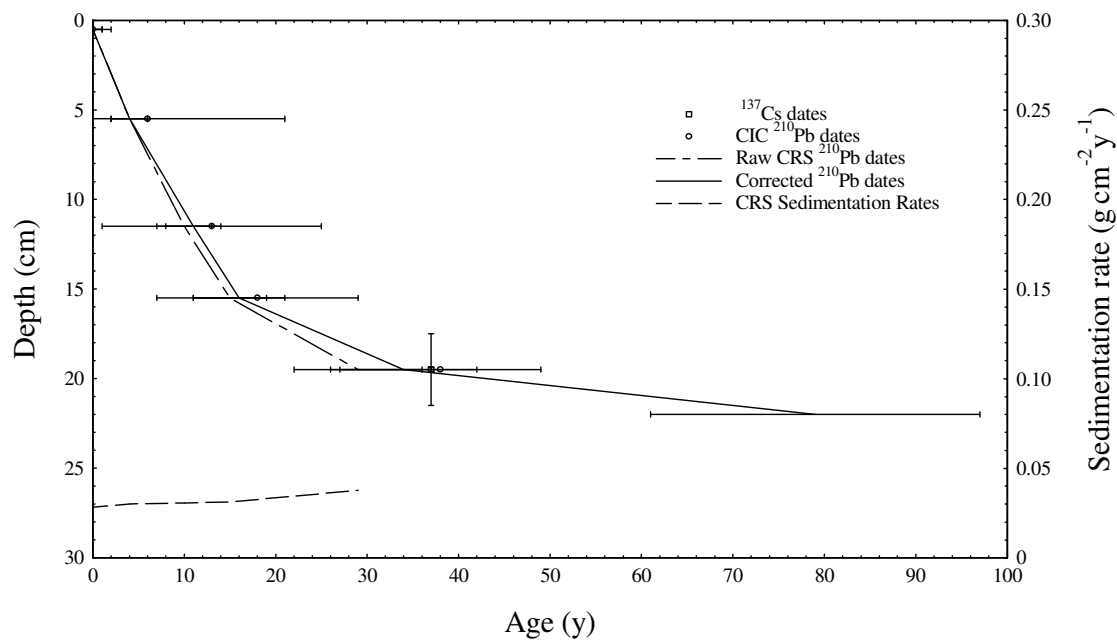

**Figure S5ii.** Radiometric chronology of Lake Sullivan core FILE2, showing CRS and CIC model  $^{210}\text{Pb}$  dates, the 1964/5 depth determined from the  $^{137}\text{Cs}$  stratigraphy, and the corrected  $^{210}\text{Pb}$  dates.

## S6. Cross-correlation of cores for Sombre Lake and Heywood Lake (Signy Island)

Sombre Lake: (a) Correlation between SOMB2 ( $^{210}\text{Pb}$  dated) and SOMB5 (undated) using lithostratigraphic data and (b) depth age profiles for the correlated cores.

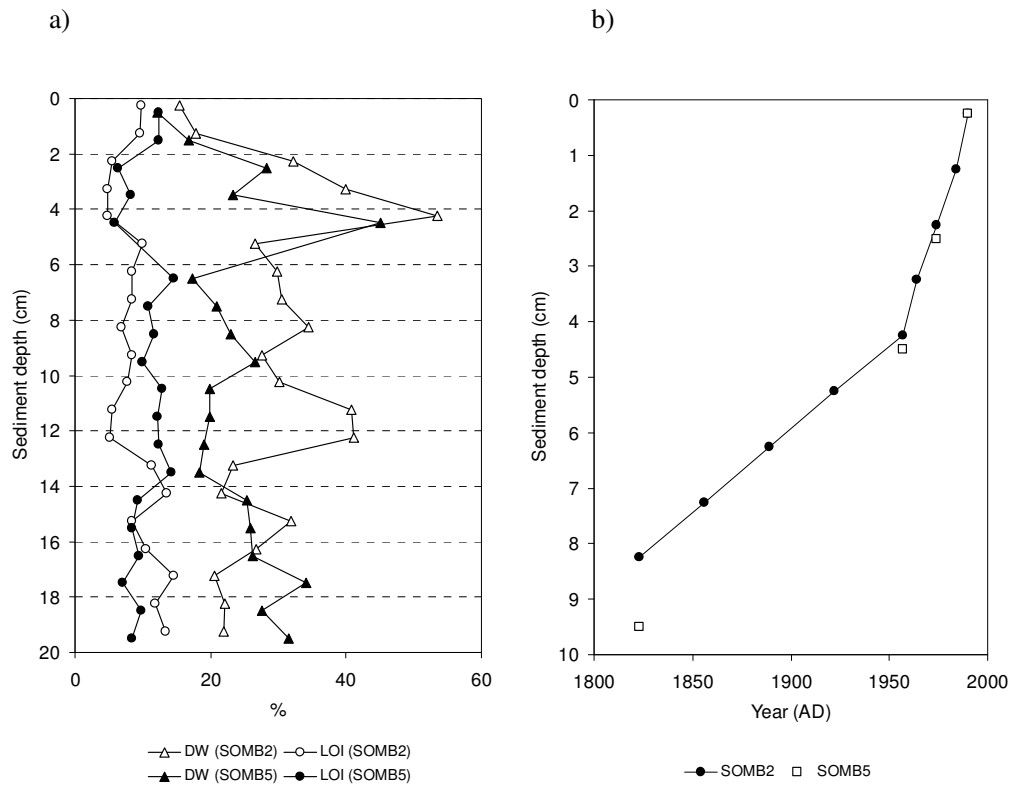



Heywood Lake: (a) Correlation between HEY2 ( $^{210}\text{Pb}$  dated) and HEY1 (undated) using lithostratigraphic data and (b) depth age profiles for the correlated cores.

a)

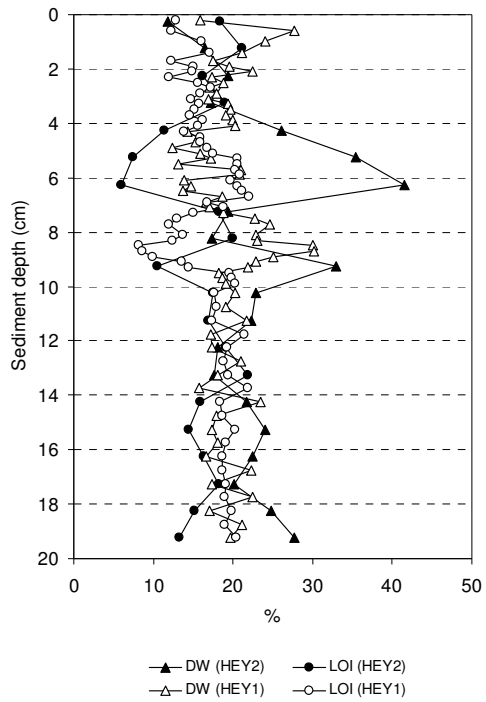

b)

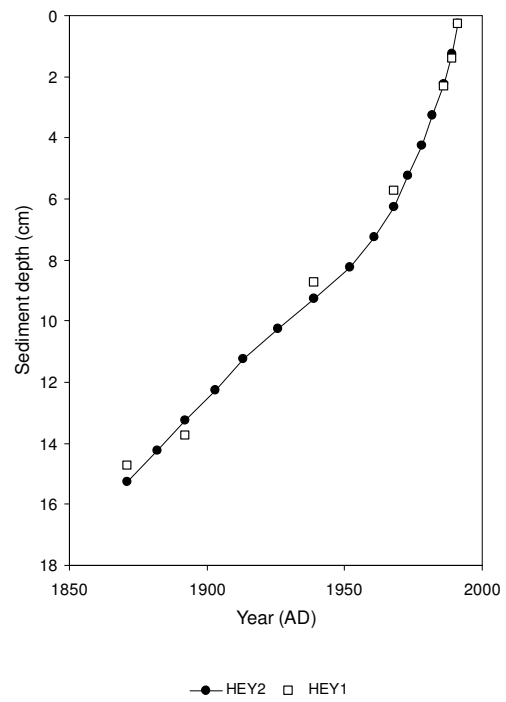

**S7. Depth-age profiles for the lake sediment cores used in this study** derived from  $^{210}\text{Pb}$  chronologies. LH68 refers to the core from Heart Lake in the Larsemann Hills; FILP1 is from Mt Adam Tarn and FILE2, Lake Sullivan, on the Falkland Islands; HEY1, SOMB5 and TRAN1 are from Heywood Lake, Sombre Lake and Tranquil Lake respectively, on Signy Island.

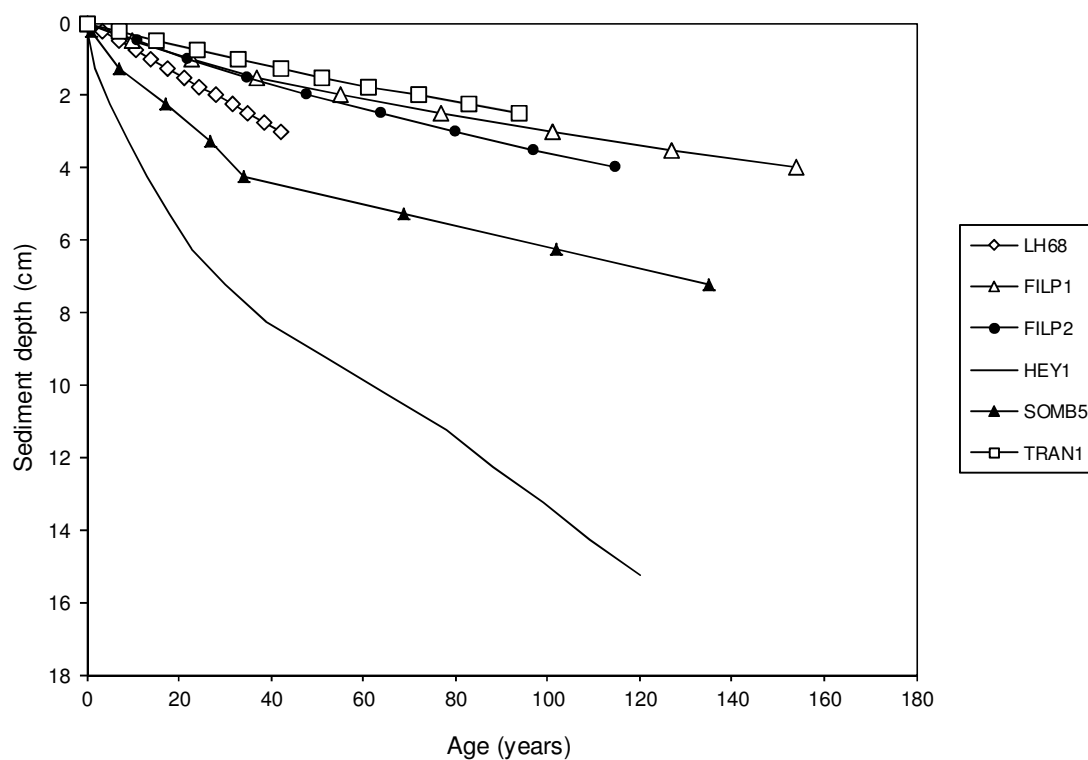

Supplement: Supplementary file 1 [file 4128973]
